# Supplementary material for: Protocol for qRT-PCR analysis from formalin fixed paraffin embedded tissue sections from diffuse large b-cell lymphoma: Validation of the six-gene predictor score
Source: PubMed Central journal article supplement (PMC5347772; doi:10.18632/oncotarget.13066), 2016-11-04
Supplement: oncotarget-07-83319-s001.pdf [file oncotarget-07-83319-s001.pdf]

# Protocol for qRT-PCR analysis from formalin fixed paraffin embedded tissue sections from diffuse large b-cell lymphoma: Validation of the six-gene predictor score

## SUPPLEMENTARY FIGURES AND TABLES

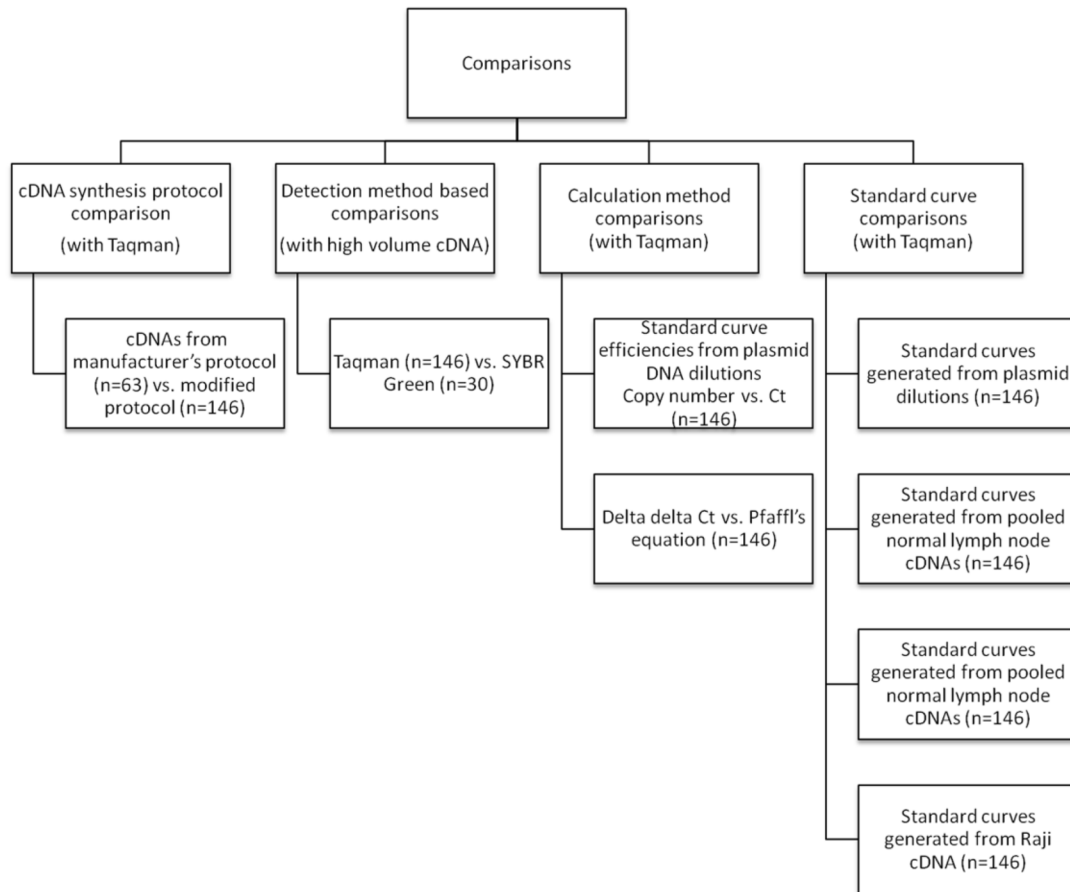

**Supplementary Figure S1: Comparison workflow.** Samples with Cts above 35 for ABL were not included for methods analyses.

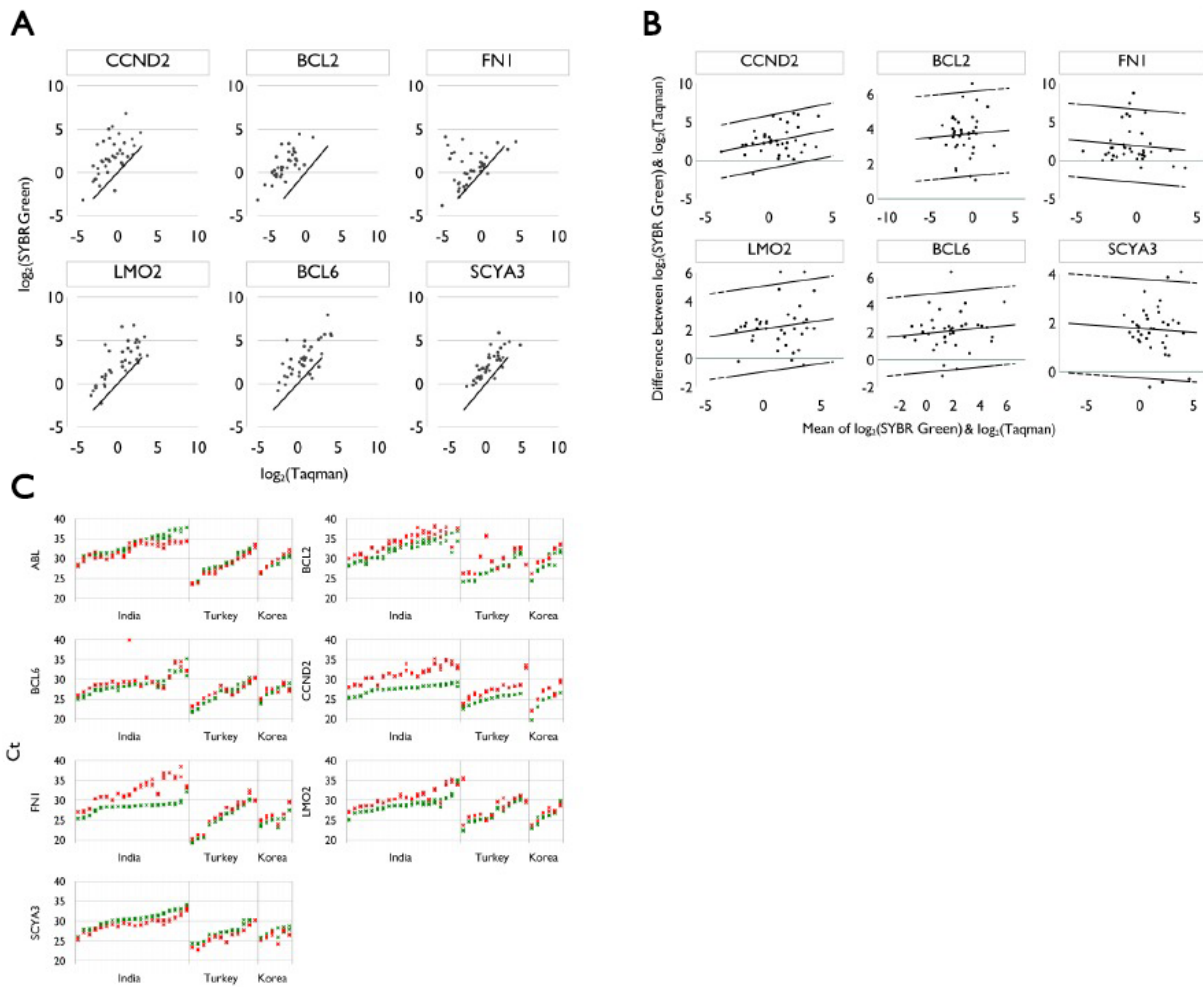

**Supplementary Figure S2: Taqman vs SYBR Green Chemistry Comparison.** The Data showed high correlation between the both chemistries for the each of the six genes. qRT-PCR results performed with the cDNA samples synthesized with High Volume Synthesis Protocol. **A.** LoA Analysis. **B.** Correlation Analysis. **C.** Comparison with Ct values (SYBR Green is depicted with green crosses, Taqman chemistry depicted with red crosses) using samples from India, Turkey and Korea for the genes shown.

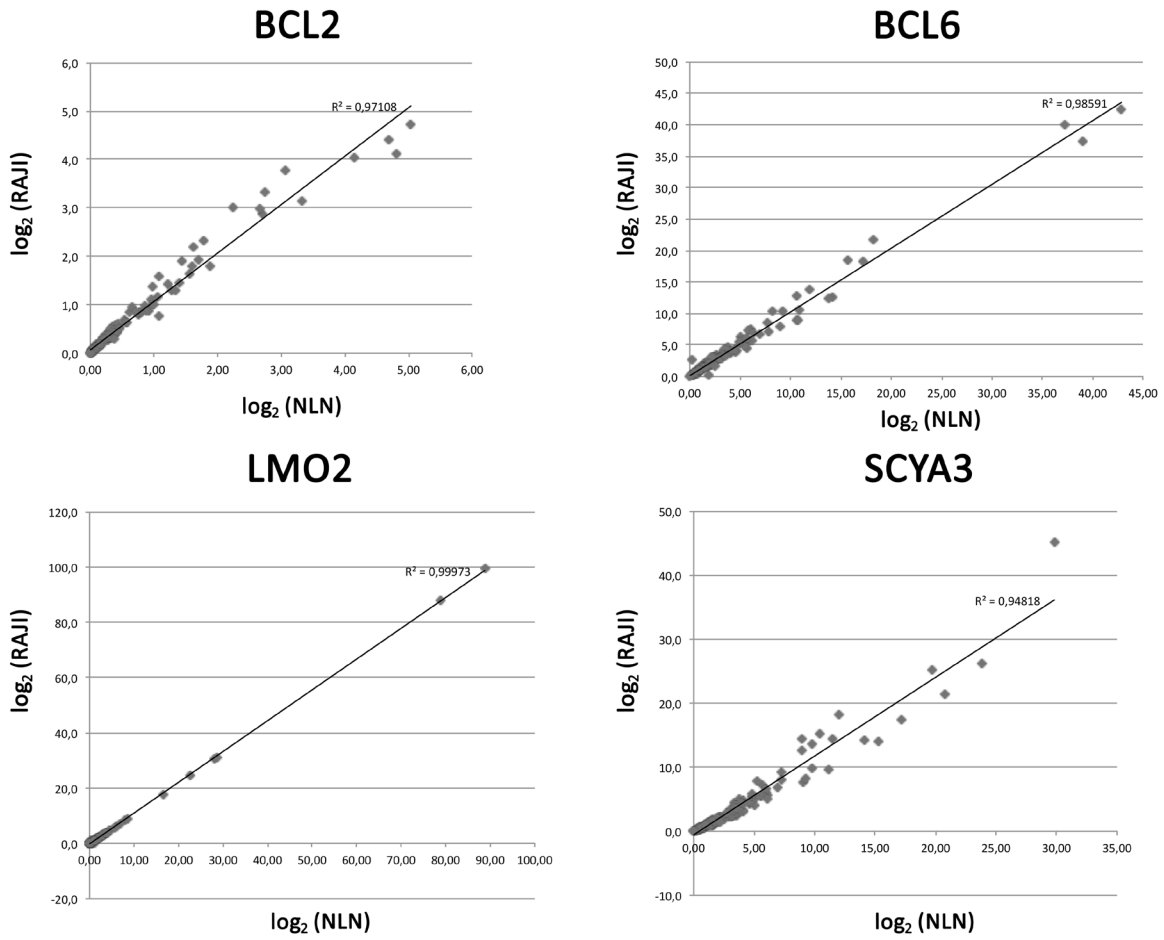

**Supplementary Figure S3: Standard Curve Correlation Analysis.** NLN vs Raji correlation on BCL2 ( $r^2=0.97$ ), BCL6 ( $r^2=0.99$ ), LMO2 ( $r^2=0.99$ ), SCYA3 ( $r^2=0.95$ ) expression.

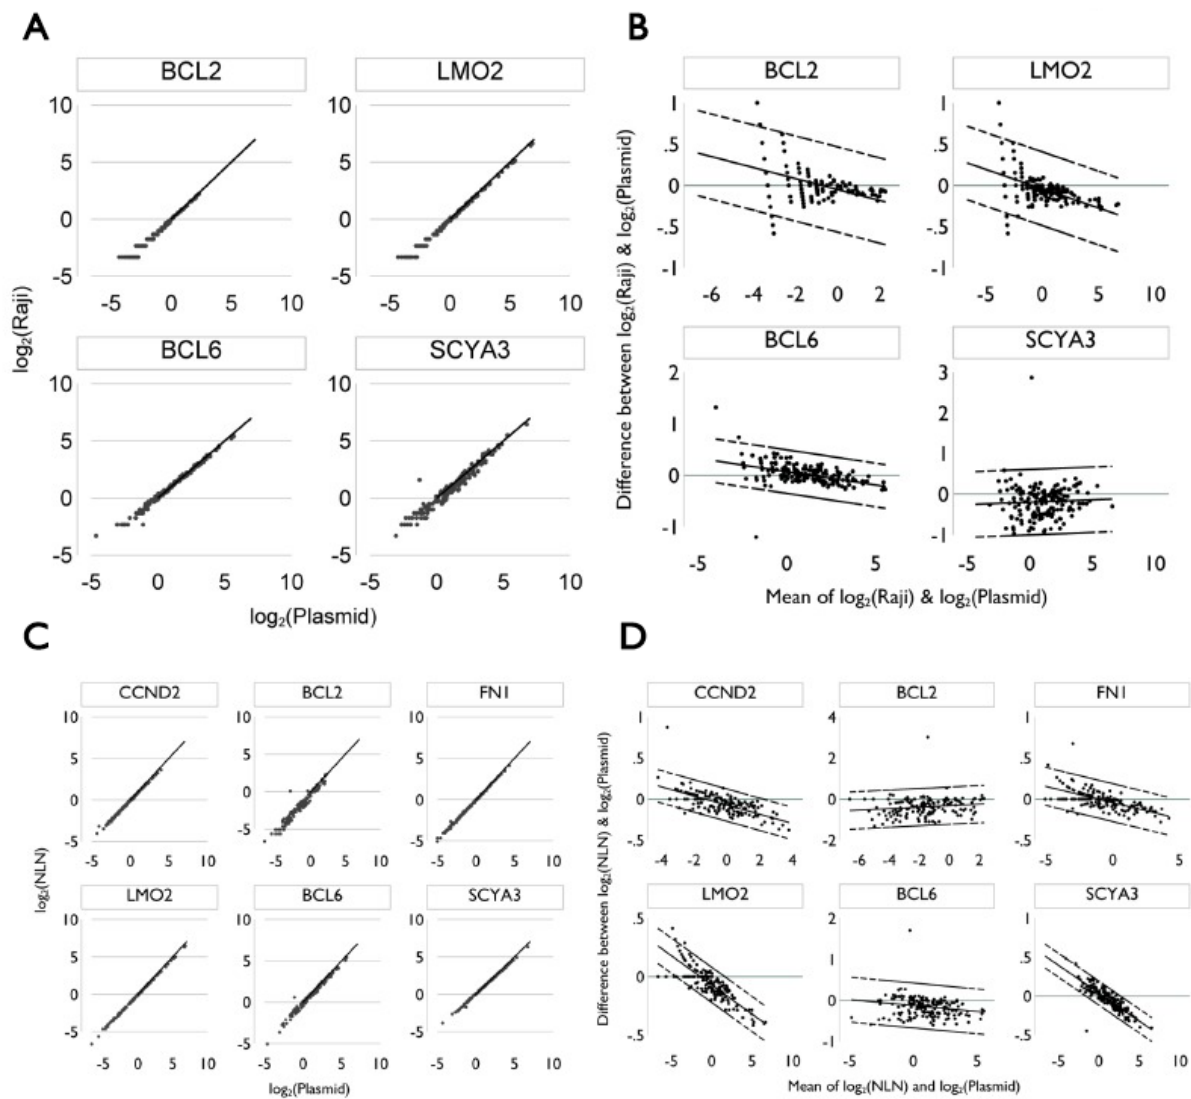

**Supplementary Figure S4: Standard Curve Correlation Analysis.** The data showed high compatibility between three standard curves from the Raji cell line, plasmids and NLN. **A.** Plasmid vs Raji Correlation on BCL2, LMO2, BCL6 and SCYA3 expression ( $r^2=0.99$  except for SCYA3 ( $r^2=0.98$ )). **B.** Plasmid vs Raji LoA on BCL2, LMO2, BCL6 and SCYA3 expression. **C.** Plasmid vs NLN Correlation on six-genes. **D.** Plasmid vs NLN LoA of the six-genes ( $r^2=0.99$ ).

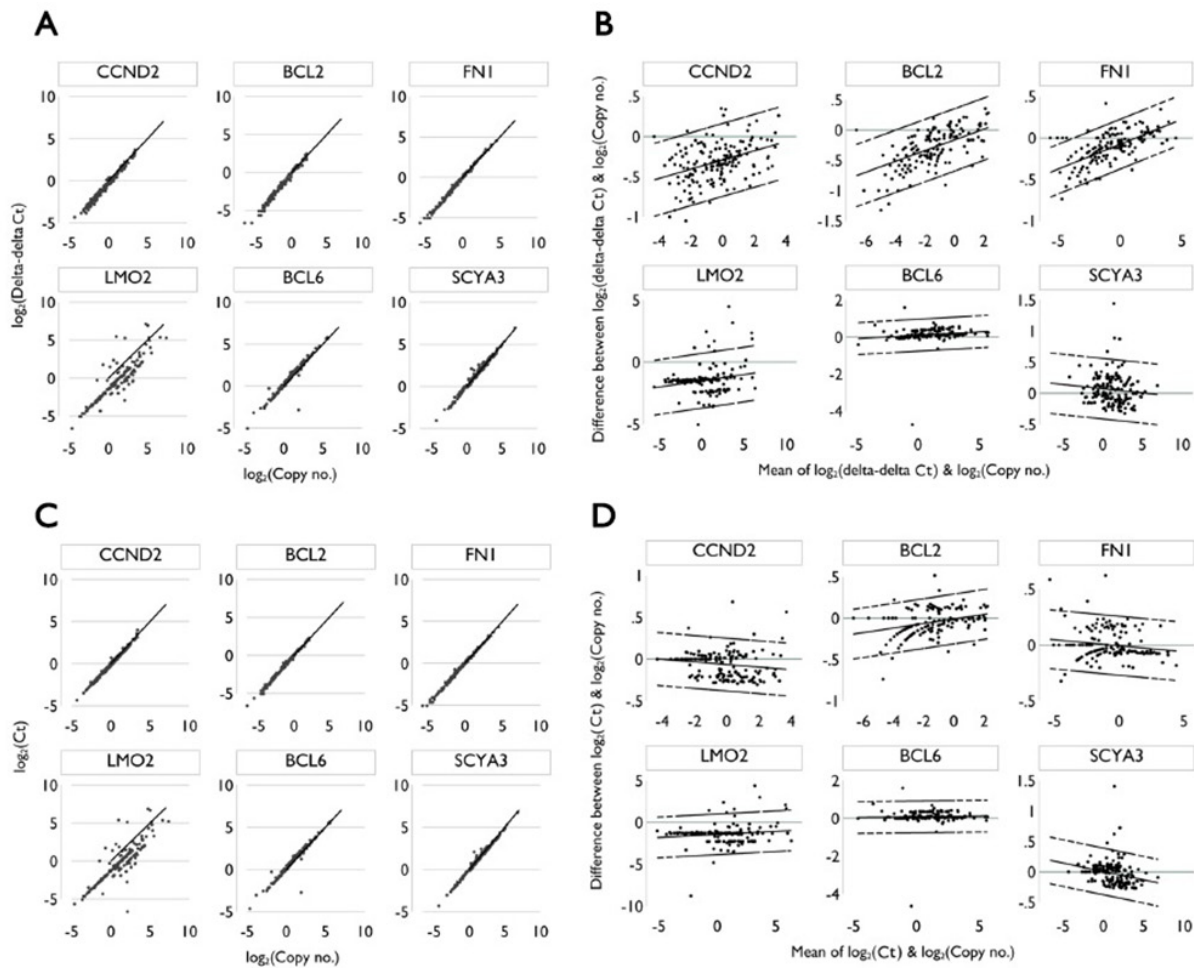

**Supplementary Figure S5: Copy Number vs Ct Calculation Comparison.** The data shows the concordance between the expression calculation methods. cDNA samples synthesized with High Volume Synthesis Protocol. **A.** Delta Delta Ct vs Copy Number Correlation Analysis ( $r^2=0.99$ ). **B.** Delta Delta Ct vs Copy Number LoA. **C.** Pfaffl's Equation vs Copy Number Correlation Analysis. **D.** Pfaffl's Equation vs Copy Number LoA: Limits of agreement Analysis ( $r^2=0.99$ ).

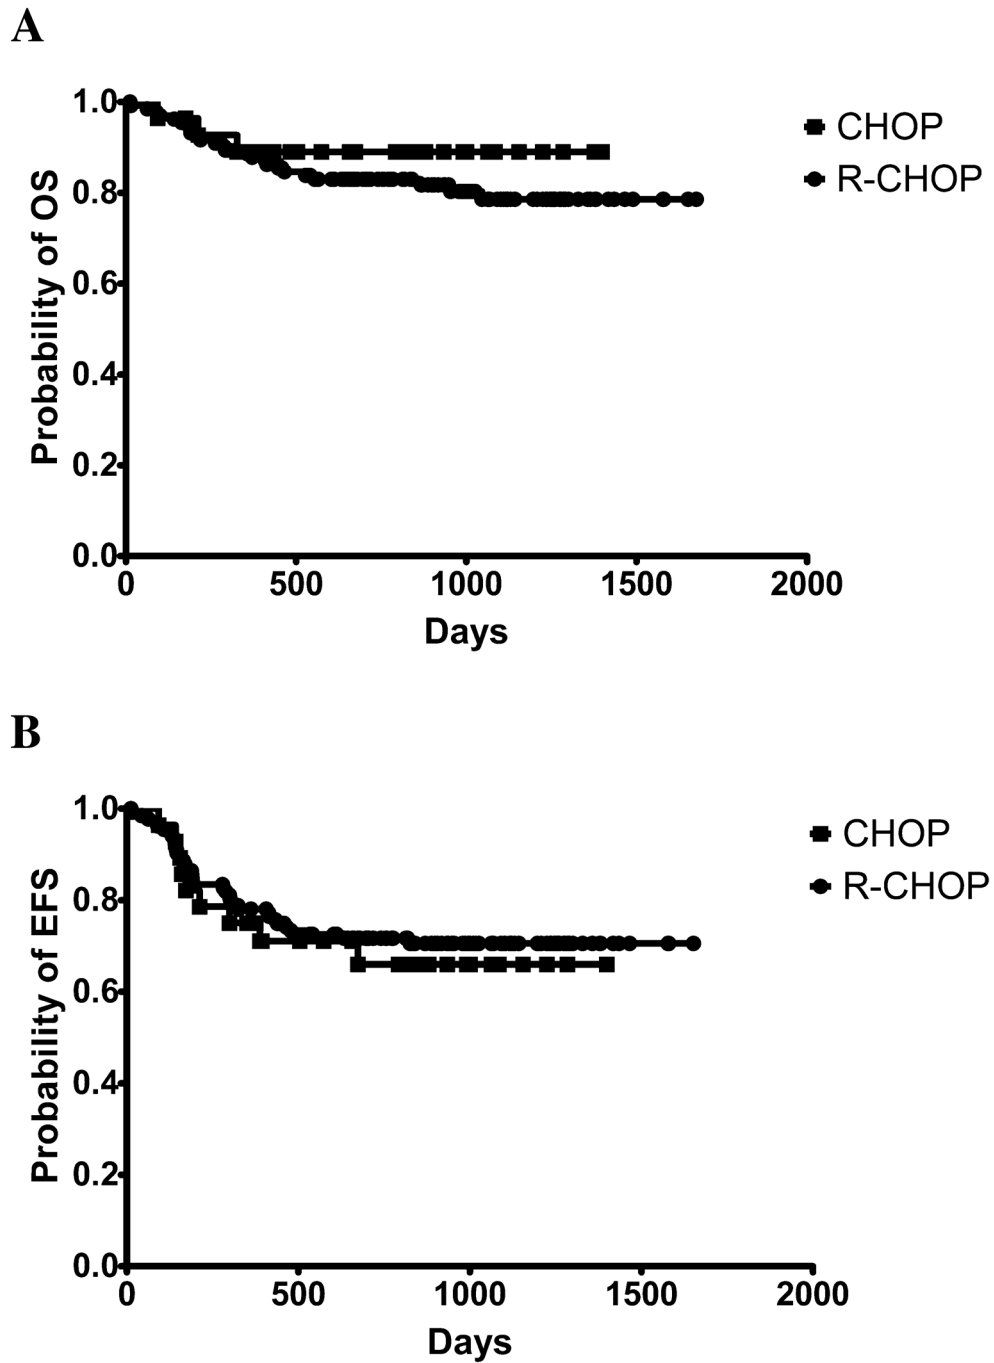

Supplementary Figure S6: Kaplan-Meier survival curve comparison of CHOP versus R-CHOP treatment regimens in terms of overall survival (OS) and event free survival (EFS). No significant difference was observed between CHOP versus R-CHOP treatment in terms of OS (A;  $p=0.41$ ) or EFS (B;  $p=0.66$ ),  $n=28$  CHOP,  $n=134$  R-CHOP.

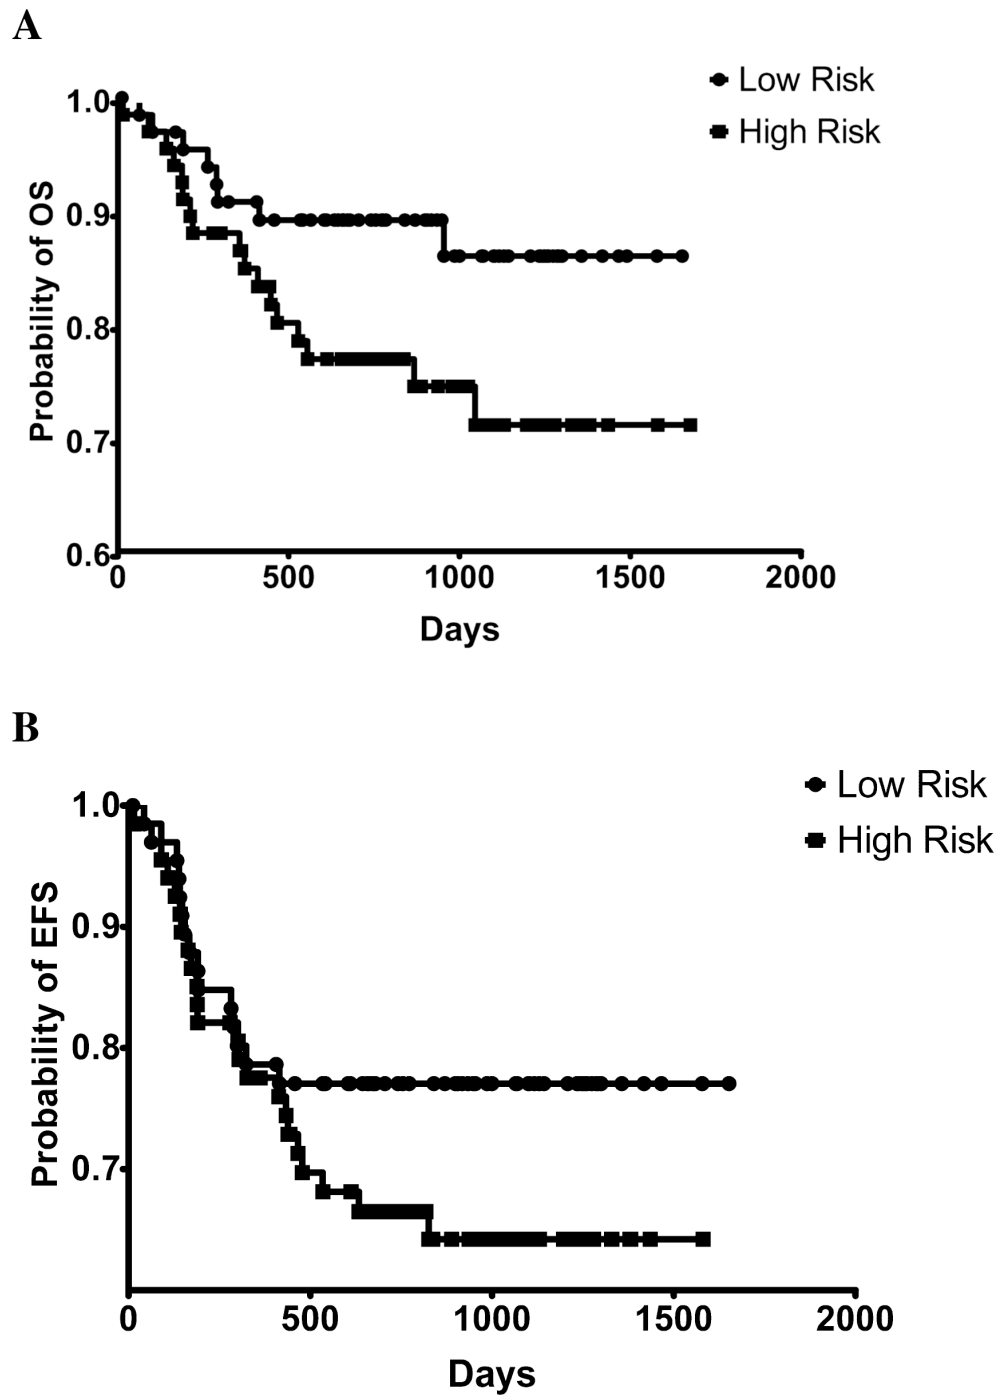

**Supplementary Figure S7: Kaplan-Meier survival curve comparison of low vs high risk groups of R-CHOP treated cohort.** No Significant difference was observed in the R-CHOP cohort between the low risk (n=67) versus high risk (n=67) 6-gene predictor score in terms of OS (A; p=0.06) and EFS (B; p=0.19).

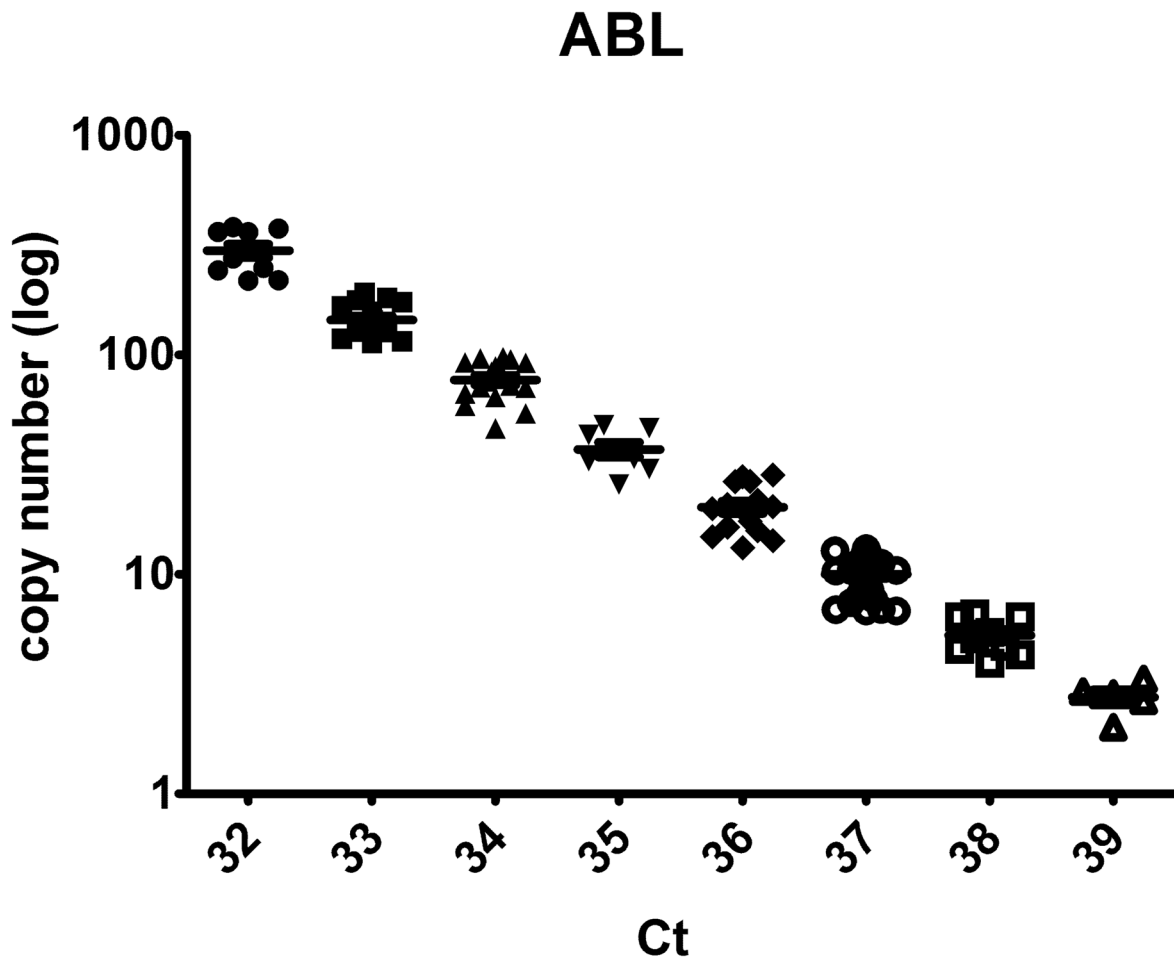

Supplementary Figure S8: Using the plasmid construct (see Materials and Methods) Log Copy number vs Ct of ABL for n=107 patient samples with low volume synthesis showing a linear correlation at the high Ct range.



**Supplementary Table S1: Number of samples processed with different cDNA synthesis protocols**

| <b>cDNA Synthesis protocol</b> | <b>Taqman</b> | <b>SYBR Green</b> |
|--------------------------------|---------------|-------------------|
| Low Volume Synthesis           | 63            | 19                |
| High Volume Synthesis          | 146           | 46                |

Supplementary Table S2: Summary of the qRT-PCR reactions

| Countries                   | Taqman           |                 | Sybr Green       |                 |
|-----------------------------|------------------|-----------------|------------------|-----------------|
|                             | High volume cDNA | Low volume cDNA | High volume cDNA | Low volume cDNA |
| Brazil                      | NA               | 14              | NA               | NA              |
| Chile                       | 33               | 29              | NA               | NA              |
| Hungary                     | 28               | NA              | NA               | NA              |
| India                       | 22               | NA              | 13               | NA              |
| Korea                       | 6                | 4               | 6                | 5               |
| Philippines                 | 13               | 5               | 0                | 0               |
| Thailand                    | 27               | 9               | 0                | 0               |
| Turkey                      | 17               | 2               | 11               | 9               |
| <b>Total Patient Number</b> | <b>146</b>       | <b>63</b>       | <b>30</b>        | <b>14</b>       |

NA; indicates Not Available.

Supplementary Table S3: Cloning Primers for SYBR green reactions

| Target Gene | Primer Name | Primer Sequence                      | Amplicon Size | Annealing Temperature (°C) |
|-------------|-------------|--------------------------------------|---------------|----------------------------|
| ABL         | ABLF        | ttc agc ggc cag tag cat<br>ctg act t | 263           | 62                         |
|             | ABLR        | gat gta gtt gct tgg gac<br>cca       |               |                            |
| BCL2        | BCL2F       | cgg tgg ggt cat gtg tgt<br>gga       | 280           | 60                         |
|             | BCL2R       | ggg gca ggc atg ttg act<br>tea ct    |               |                            |
| BCL6        | BCL6F       | gcc cta caa atg cga aac<br>ctg c     | 362           | 64                         |
|             | BCL6R       | tga gaa ggg gct gga<br>gac gaa a     |               |                            |
| CCND2       | CCND2F      | cct tcc gca gtg ctc cta<br>ctt caa   | 271           | 62                         |
|             | CCND2R      | ggt gta aat gca cag ctt<br>ctc cgc   |               |                            |
| FN1         | FN1F        | gct tcg gtc agg gtc<br>ggg g         | 285           | 62                         |
|             | FN1R        | tgg aaa tgt gag atg gct<br>gtg gtg   |               |                            |
| LMO2        | LMO2F       | cta ctt cct gaa ggc cat<br>cga c     | 204           | 60                         |
|             | LMO2R       | att gtc atc tca tag gca<br>cga atc   |               |                            |
| SCYA3       | SCYA3F      | gcc cac att ceg tca cct<br>gct       | 309           | 62                         |
|             | SCYA3R      | cct cag gca ctc agc tcc<br>agg t     |               |                            |

Supplementary Table S4: Primer sequences and PCR conditions of used SYBR green qRT-PCR

| Target Gene | Primer Name | Primer Sequence                              | Amplicon Size | Annealing Temperature (°C) |
|-------------|-------------|----------------------------------------------|---------------|----------------------------|
| ABL         | ENF1003     | tgg aga taa cac tct aag<br>cat aac taa agg t | 124           | 60                         |
|             | ENR1063     | gat gta gtt gct tgg gac<br>cca               |               |                            |
| BCL2        | BCL2-F      | acc tgc aca cct gga<br>tcc a                 | 96            | 60                         |
|             | BCL2-R      | aca gcc agg aga aat caa<br>aca ga            |               |                            |
| BCL6        | BCL6-F      | gcg aat cca cac agg<br>aga gaa               | 63            | 60                         |
|             | BCL6-R      | ttg tga cgg aaa tgc agg<br>tta c             |               |                            |
| CCND2       | CCND2-F     | ccc tac atg cgc aga<br>atg gt                | 72            | 60                         |
|             | CCND2-R     | gac ctc ttc ttc gca ctt<br>ctg ttc           |               |                            |
| FN1         | FN1-F       | cta tgg ccg tgg cat tgg                      | 112           | 60                         |
|             | FN1-R       | gtg gga gtt ggg ctg act                      |               |                            |
| LMO2        | LMO2-F      | caa act ggg ccg gaa gct                      | 68            | 60                         |
|             | LMO2-R      | atg cgc aga gac cgt<br>ctt g                 |               |                            |
| SCYA3       | SCYA3-F     | atg gct ctc tgc aac cag<br>ttc t             | 53            | 60                         |
